# Supplementary material for: COVID-19 Vaccinations: Perceptions and Behaviours in People with Primary Ciliary Dyskinesia
Source: MDPI journal article supplement (doi:10.3390/vaccines9121496), 2021-12-17
Supplement: s1 [file s1]

## Supplementary information

**Supplementary Table S1:** Formulation of questions and answers from the special questionnaire on COVID-19 vaccinations sent to participants in May 2021. (COVID-PCD study, May 2021).

| Question                                                                                                                                                                                                                                    | Answer category                                                                                                                                                                                                                                                                                                                                                                                                                                                                                                                                                                                                                                                                                                                                                                                                                                                                                                                                                                                                                                                                                                                                                                                                                                                                                                                                                                                                                                   |
|---------------------------------------------------------------------------------------------------------------------------------------------------------------------------------------------------------------------------------------------|---------------------------------------------------------------------------------------------------------------------------------------------------------------------------------------------------------------------------------------------------------------------------------------------------------------------------------------------------------------------------------------------------------------------------------------------------------------------------------------------------------------------------------------------------------------------------------------------------------------------------------------------------------------------------------------------------------------------------------------------------------------------------------------------------------------------------------------------------------------------------------------------------------------------------------------------------------------------------------------------------------------------------------------------------------------------------------------------------------------------------------------------------------------------------------------------------------------------------------------------------------------------------------------------------------------------------------------------------------------------------------------------------------------------------------------------------|
| Have you been vaccinated against COVID-19?                                                                                                                                                                                                  | No<br>No, but I have an appointment to get vaccinated<br>Yes, I received one dose<br>Yes, I received two doses                                                                                                                                                                                                                                                                                                                                                                                                                                                                                                                                                                                                                                                                                                                                                                                                                                                                                                                                                                                                                                                                                                                                                                                                                                                                                                                                    |
| Do you plan to get vaccinated against COVID-19?                                                                                                                                                                                             | No, I don't plan to get vaccinated<br>I am not sure if I want to get vaccinated<br>Yes, I plan to get vaccinated<br>Other (please explain)                                                                                                                                                                                                                                                                                                                                                                                                                                                                                                                                                                                                                                                                                                                                                                                                                                                                                                                                                                                                                                                                                                                                                                                                                                                                                                        |
| Which COVID-19 vaccine did you get?                                                                                                                                                                                                         | Pfizer-BioNTech (BNT162b2)<br>Moderna (mRNA-1273)<br>AstraZeneca, also called Oxford vaccine (AZD1222)<br>Janssen/Johnson & Johnson (Ad26.COV2.S.)<br>Sputnik V<br>CoronavAC (Sinovac)<br>BBIBP-CorV (Sinopharm)<br>EpiVacCorona<br>Convidicea (Ad5nCov) (CanSino Biologics)<br>Covaxin (Bharat Biotech)<br>Other<br>I don't know                                                                                                                                                                                                                                                                                                                                                                                                                                                                                                                                                                                                                                                                                                                                                                                                                                                                                                                                                                                                                                                                                                                 |
| What are your reasons to get vaccinated against COVID-19 (Please rate the reasons from unimportant to very important)                                                                                                                       | It will protect me from getting sick if I get infected with SARS-CoV-2<br>It will protect others from getting infected<br>It will help to stop the pandemic<br>It will allow me to see friends and family members again<br>It will allow me to travel abroad<br>It will allow me to go to the gym, cinemas, restaurants and other places<br>Side effects are usually mild<br>Other (please explain below)                                                                                                                                                                                                                                                                                                                                                                                                                                                                                                                                                                                                                                                                                                                                                                                                                                                                                                                                                                                                                                         |
| What are your reasons for not wanting to get vaccinated against COVID-19 or want to wait and perhaps get vaccinated later? Please rate below how much you agree with the reasons below on a scale from strongly disagree to strongly agree. | I already had confirmed COVID-19 disease or tested positive for antibodies<br>I am concerned about side effects of the vaccine<br>I experienced side effects when getting the first shot of vaccine and now I don't want to get the second shot of vaccine<br>I want to see how the vaccine works on other people before I get it<br>Someone I know had a severe side effect after a COVID-19 vaccine and I am afraid this might also happen to me<br>I am concerned that the vaccine will affect my fertility<br>I am concerned that the development of the COVID-19 vaccines was too rushed<br>I am concerned about the ingredients in the vaccine<br>I don't think the COVID-19 vaccine will protect me<br>I would have to pay for it, and I can't afford it<br>I don't like needles<br>I think I would only get mild symptoms from COVID-19 if I got it<br>I am at low risk for getting COVID-19 so I don't need it<br>I would rather risk getting COVID-19 than the vaccine<br>I think that there will be enough other people in my community who will get the vaccine, to enable herd immunity, so I won't have to<br>Few people have COVID-19 in my area so I don't think I will get it<br>I don't like people telling me what I have to do<br>It's against my religious beliefs<br>I am concerned that the vaccine could give me COVID-19<br>COVID-19 is a hoax<br>I don't know where to get this vaccine<br>Other (please explain below) |
| Have you changed the way you protect yourself against COVID-19 since you                                                                                                                                                                    | No, I shield the same way as before getting vaccinated by avoiding public places and seeing as few people as possible<br>Yes, now I go more often for grocery shopping<br>Yes, now I go more often for other shopping than groceries                                                                                                                                                                                                                                                                                                                                                                                                                                                                                                                                                                                                                                                                                                                                                                                                                                                                                                                                                                                                                                                                                                                                                                                                              |

|                                                                                |                                                                                                                                                                                                                                                                                                                                                                                                                                                                                                                                                                                                                                                 |
|--------------------------------------------------------------------------------|-------------------------------------------------------------------------------------------------------------------------------------------------------------------------------------------------------------------------------------------------------------------------------------------------------------------------------------------------------------------------------------------------------------------------------------------------------------------------------------------------------------------------------------------------------------------------------------------------------------------------------------------------|
| got vaccinated? (e.g., you leave your house more often or you see more people) | <p>Yes, now I go more often for appointments such as hairdresser and physiotherapy</p> <p>Yes, now I go more often for exercise outdoors (e.g., walking, running, cycling)</p> <p>Yes, now I go more often for exercise indoors (e.g., fitness, indoor team sports)</p> <p>Yes now I go more often to my workplace</p> <p>Yes, now I more often see family members</p> <p>Yes, now I more often see friends</p> <p>Yes, now I more often use public transport</p> <p>Yes, I started shaking hands or hugging friends and family</p> <p>Yes, I don't protect myself anymore because I am vaccinated</p> <p>yes, other (please explain below)</p> |
| If you have any comments about COVID-19 vaccines, please describe here         | Freetext                                                                                                                                                                                                                                                                                                                                                                                                                                                                                                                                                                                                                                        |

**Supplementary Table S2:** Characteristics of people with primary ciliary dyskinesia who completed the special questionnaire on COVID-19 vaccinations and those who did not. (COVID-PCD study, May 2021).

|                              | Completed<br>vaccination<br>questionnaire | Did not complete<br>vaccination<br>questionnaire |
|------------------------------|-------------------------------------------|--------------------------------------------------|
|                              | N=423                                     | N=266                                            |
|                              | n (%)                                     | n (%)                                            |
| <b>Age, median (range)</b>   | 30 (1-85)                                 | 24 (1-69)                                        |
| <b>Age groups</b>            |                                           |                                                  |
| 0-12 y                       | 95 (22)                                   | 75 (28)                                          |
| 13-17 y                      | 41 (10)                                   | 24 (9)                                           |
| 18 y or above                | 287 (68)                                  | 170 (63)                                         |
| <b>Sex</b>                   |                                           |                                                  |
| Female                       | 261 (62)                                  | 152 (57)                                         |
| <b>Country of residence</b>  |                                           |                                                  |
| United Kingdom               | 88 (21)                                   | 54 (20)                                          |
| USA                          | 64 (15)                                   | 59 (22)                                          |
| Germany                      | 76 (18)                                   | 19 (7)                                           |
| Italy                        | 24 (6)                                    | 22 (8)                                           |
| Switzerland                  | 31 (7)                                    | 16 (6)                                           |
| France                       | 23 (5)                                    | 16 (6)                                           |
| Australia                    | 14 (3)                                    | 13 (5)                                           |
| Other European countries     | 81 (19)                                   | 36 (14)                                          |
| Other non-European countries | 22 (5)                                    | 31 (12)                                          |

**Supplementary Figure S1:** Speed of vaccination uptake among adults in the COVID-PCD in countries with the highest number of participants. (COVID-PCD study, May 2021). Abbreviations: UK: United Kingdom, USA: United states of America, GER: Germany, IT: Italy, CH: Switzerland, FR: France, AU: Australia.

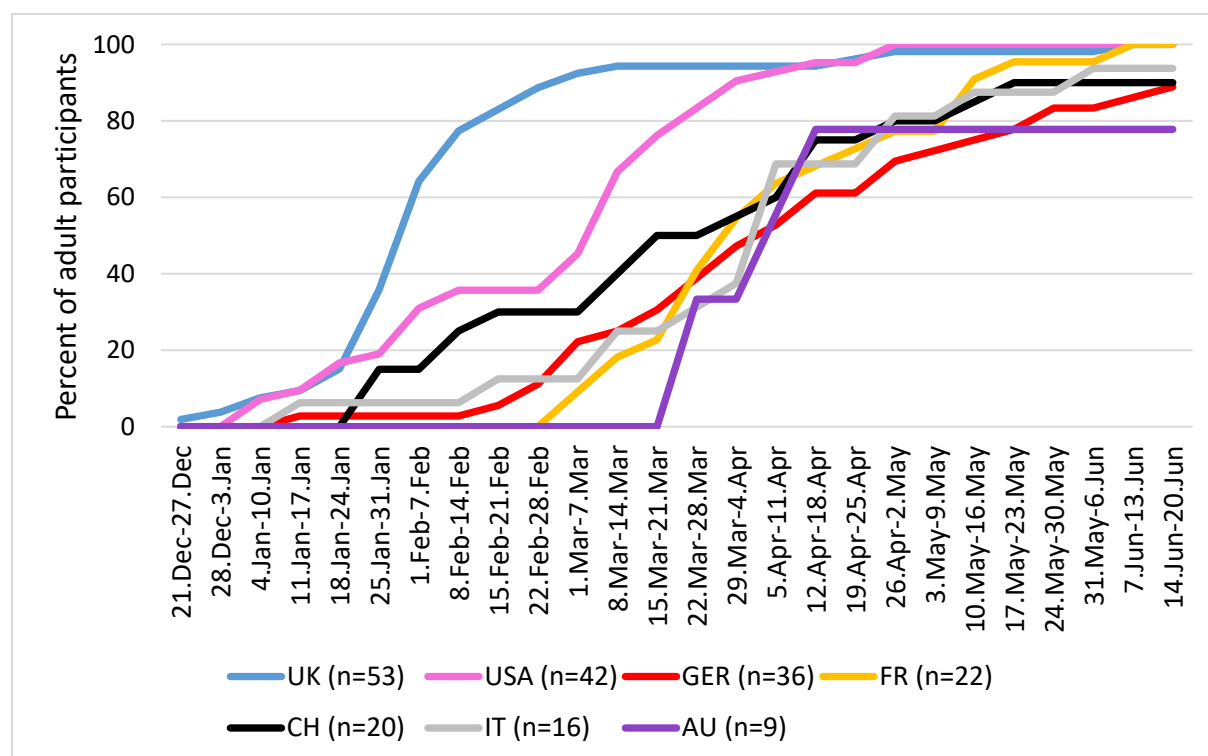

**Supplementary Table S3:** Demographic characteristics of adults with primary ciliary dyskinesia who were already vaccinated or willing to be compared to adults who were unwilling to get vaccinated. (COVID-PCD study, May 2021).

|                              | Vaccinated or<br>willing to be | Unsure or<br>unwilling to get<br>vaccinated | p-Value |
|------------------------------|--------------------------------|---------------------------------------------|---------|
|                              | N=262                          | N=21                                        |         |
|                              | n (%)                          | n (%)                                       |         |
| <b>Age, median (range)</b>   | 41 (30-52)                     | 37 (25-51)                                  | 0.210*  |
| <b>Sex</b>                   |                                |                                             |         |
| Female                       | 178 (69)                       | 15 (71)                                     | 0.506#  |
| <b>Country of residence</b>  |                                |                                             | 0.023   |
| United Kingdom               | 56 (21)                        | 2 (10)                                      |         |
| USA                          | 42 (16)                        | 1 (5)                                       |         |
| Germany                      | 37 (14)                        | 5 (24)                                      |         |
| Italy                        | 15 (6)                         | 1 (5)                                       |         |
| Switzerland                  | 16 (6)                         | 4 (19)                                      |         |
| France                       | 19 (7)                         | 0                                           |         |
| Australia                    | 6 (2)                          | 3 (14)                                      |         |
| Other European countries     | 55 (21)                        | 4 (19)                                      |         |
| Other non-European countries | 16 (6)                         | 1 (5)                                       |         |

\*Wilcoxon–Mann–Whitney test; #Fisher’s exact.

**Supplementary Figure S2:** Cumulative percent of COVID-PCD study participants vaccinated (black thick line), compared with nationwide data from selected countries (colored lines, data source: [https://github.com/owid/covid-19-data/tree/master/public/data/vaccinations/country\\_data](https://github.com/owid/covid-19-data/tree/master/public/data/vaccinations/country_data), downloaded 24.08.2021).

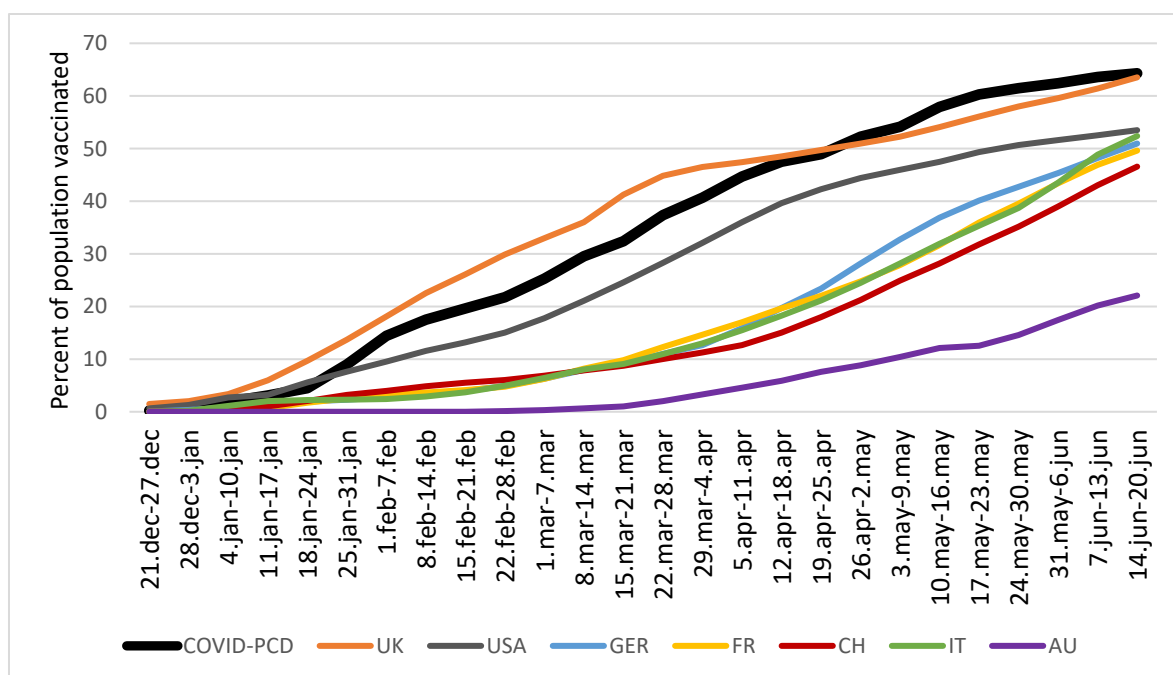

Nationwide data shown for countries from which at least 15 people participated in the COVID-PCD study by August 2021. Abbreviations: UK: United Kingdom, USA: United states of America, GER: Germany, IT: Italy, CH: Switzerland, FR: France, AU: Australia.
